# Supplementary material for: RuIII(edta)-mediated interaction of nitrite and sulphide: formation of an N-bonded thionitrous acid (HSNO) complex of RuIII(edta) in aqueous solution
Source: Royal Society of Chemistry journal article supplement (doi:10.1039/c9nj04074a), 2019-01-01
Supplement: c9nj04074a1.pdf [file c9nj04074a1.pdf]

## Electronic Supplementary Information (ESI)

# Ru<sup>III</sup>(edta)-Mediated Interaction of Nitrite and Sulphide: Formation of N-bonded Thionitrous acid (HSNO) Complex of Ru<sup>III</sup>(edta) in Aqueous Solution

Debabrata Chatterjee,<sup>\*a,b</sup> Chandra Chowdhury,<sup>b</sup> Ayan Datta<sup>b</sup> and Rudi van Eldik<sup>\*c,d</sup>

<sup>a)</sup> Vice-Chancellor's Research Group at Zoology Department, University of Burdwan, Burdwan-713104, India <sup>b)</sup> School of Chemical Sciences, Indian Association for the Cultivation of Science, Jadavpur, Kolkata-700032, India <sup>c)</sup> Department of Chemistry and Pharmacy, University of Erlangen-Nuremberg, Egerlandstr. 1, 91058 Erlangen, Germany <sup>d)</sup> Faculty of Chemistry, N. Copernicus University, Gagarina 7, 87-100 Toruń, Poland

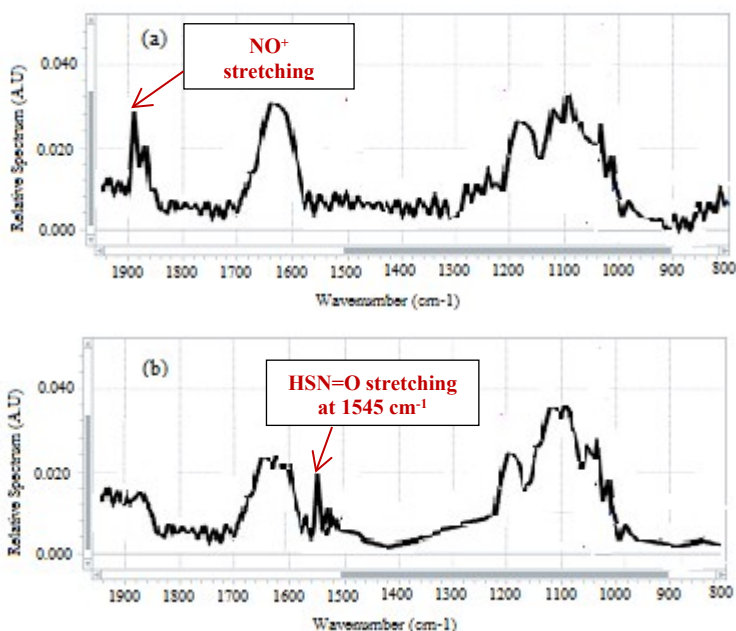

**Figure S1.** IR spectra of (a) [Ru<sup>III</sup>(edta)(NO<sup>+</sup>)] in solution and (b) the resultant solution that was obtained by reacting [Ru<sup>III</sup>(edta)(NO<sup>+</sup>)] with NaHS leading to the formation of N-bonded [Ru<sup>III</sup>(edta)(N(O)SH)].

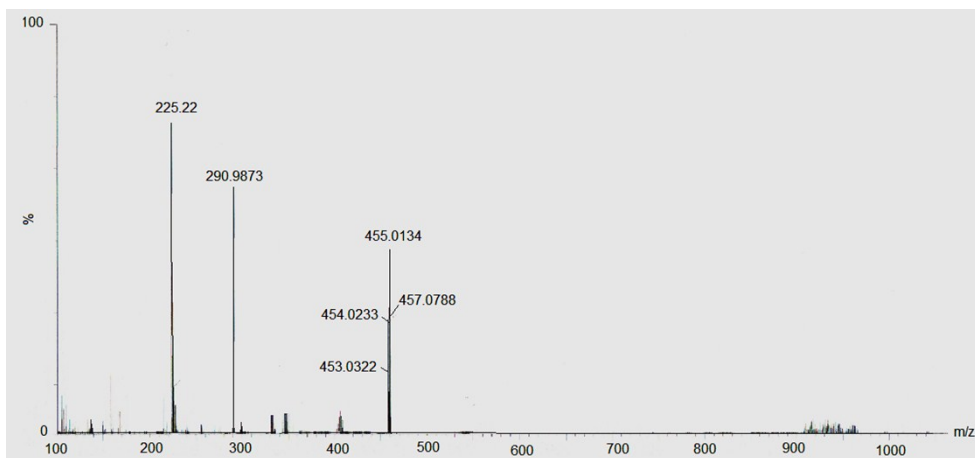

**Figure S2.** ESI-MS spectrum recorded for the resultant solution that was obtained after addition of NaHS to the solution of  $[\text{Ru}^{\text{III}}(\text{edta})(\text{NO}^+)]$ .  $[\text{Ru}^{\text{III}}] = 0.2 \text{ mM}$ ,  $[\text{NaHS}] = 0.5 \text{ mM}$ , pH 3.5 (acetate buffer) under Ar atmosphere.

**Table S1.** The corresponding important Ru-N and Ru-O bond-lengths for all the N- and S-bonded structures.

| System | Bonds             | Bond-length (Å) |
|--------|-------------------|-----------------|
| I      | Ru-N <sub>1</sub> | 2.11            |
|        | Ru-N <sub>2</sub> | 2.24            |
|        | Ru-O <sub>a</sub> | 2.00            |
|        | Ru-O <sub>b</sub> | 2.00            |
|        | Ru-O <sub>c</sub> | 2.01            |
| II     | Ru-N <sub>1</sub> | 2.09            |
|        | Ru-N <sub>2</sub> | 2.24            |
|        | Ru-O <sub>a</sub> | 1.99            |
|        | Ru-O <sub>b</sub> | 2.01            |
|        | Ru-O <sub>c</sub> | 2.07            |
| III    | Ru-N <sub>1</sub> | 2.13            |
|        | Ru-N <sub>2</sub> | 2.27            |
|        | Ru-O <sub>a</sub> | 2.03            |
|        | Ru-O <sub>b</sub> | 2.02            |
|        | Ru-O <sub>c</sub> | 2.07            |
| IV     | Ru-N <sub>1</sub> | 2.10            |
|        | Ru-N <sub>2</sub> | 2.17            |
|        | Ru-O <sub>a</sub> | 2.04            |
|        | Ru-O <sub>b</sub> | 2.02            |
|        | Ru-O <sub>c</sub> | 2.08            |
| V      | Ru-N <sub>1</sub> | 2.17            |
|        | Ru-N <sub>2</sub> | 2.20            |
|        | Ru-O <sub>a</sub> | 2.08            |
|        | Ru-O <sub>b</sub> | 2.05            |
|        | Ru-O <sub>c</sub> | 2.06            |
| VI     | Ru-N <sub>1</sub> | 2.16            |
|        | Ru-N <sub>2</sub> | 2.19            |
|        | Ru-O <sub>a</sub> | 2.06            |
|        | Ru-O <sub>b</sub> | 2.07            |
|        | Ru-O <sub>c</sub> | 2.09            |

**Table S2.** Cartesian coordinates, low vibrational frequencies and energies in atomic unit (a.u.) for the optimized structures I-VI.

**Structure I**  
Low frequencies (cm<sup>-1</sup>): 26.48 30.55 44.90

|    |             |             |             |
|----|-------------|-------------|-------------|
| Ru | 0.59521000  | -0.23304100 | -0.13257900 |
| O  | 4.37244000  | 0.87414200  | 0.65632500  |
| O  | 2.59783400  | -0.23851000 | -0.16135000 |
| O  | -0.03692600 | 2.74342600  | -2.76348800 |
| O  | 0.26738600  | 0.69903600  | -1.88017200 |
| O  | -0.72565000 | -1.36405800 | 3.58754100  |
| O  | 0.55061500  | -0.92258300 | 1.79001500  |
| O  | -4.35113400 | 0.57378800  | 0.56392400  |
| O  | -4.75045000 | -0.33794600 | -1.45774400 |
| N  | 0.88698000  | 1.72935300  | 0.59940400  |
| N  | -1.55951900 | 0.09397600  | 0.38208100  |
| C  | -0.29735500 | 2.02253600  | 1.45384300  |
| C  | -1.58619100 | 1.55225100  | 0.77120200  |
| C  | 2.18855500  | 1.63826800  | 1.32526000  |
| C  | 3.17608200  | 0.72852700  | 0.55883200  |
| C  | 0.98336700  | 2.62297000  | -0.59780900 |
| C  | 0.33714300  | 2.02466500  | -1.86125300 |
| C  | -1.83572000 | -0.81508200 | 1.53811600  |
| C  | -0.59717800 | -1.05442900 | 2.41960100  |
| C  | -2.46281000 | -0.18243900 | -0.76814800 |
| C  | -3.96861600 | -0.00152100 | -0.60293100 |
| H  | -0.37287900 | 3.09994200  | 1.65611500  |
| H  | -0.15276300 | 1.51339100  | 2.40787600  |
| H  | -1.74923100 | 2.12489600  | -0.14635900 |
| H  | -2.43864200 | 1.74499600  | 1.42844600  |
| H  | 2.00435600  | 1.16574100  | 2.29397000  |

|   |             |             |             |
|---|-------------|-------------|-------------|
| H | 2.63577500  | 2.62478400  | 1.48281400  |
| H | 2.04242200  | 2.77696000  | -0.82693800 |
| H | 0.54663600  | 3.60406200  | -0.38757200 |
| H | -2.12552900 | -1.78672000 | 1.12590900  |
| H | -2.66239900 | -0.44126800 | 2.14620300  |
| H | -2.30037000 | -1.21804500 | -1.07340600 |
| H | -2.14544500 | 0.43543700  | -1.61336400 |
| N | 0.44361200  | -2.10944300 | -0.89671600 |
| O | -0.59115700 | -2.72556500 | -1.03696100 |
| S | 1.90263300  | -2.97913700 | -1.41148500 |
| H | 2.72869100  | -1.97720800 | -1.00862400 |
| H | -5.32682600 | 0.62749800  | 0.53379200  |

Energy = -1722.8368147

### Structure II

Low frequencies (cm<sup>-1</sup>): 8.22 24.30 38.49

|    |             |             |             |
|----|-------------|-------------|-------------|
| Ru | 0.54038800  | -0.01760200 | 0.35317700  |
| O  | 4.25458300  | -1.16987600 | -0.57903100 |
| O  | 2.51980200  | -0.23312700 | 0.50264400  |
| O  | -0.66343400 | -3.65999200 | 1.56292000  |
| O  | -0.07308800 | -1.48971000 | 1.58169700  |
| O  | -0.26500700 | 2.71712500  | -2.63798800 |
| O  | 0.77649400  | 1.42463500  | -1.11955300 |
| O  | -4.36850700 | 0.08495300  | -0.84845100 |
| O  | -4.83616100 | 0.51397100  | 1.31404000  |
| N  | 0.71852000  | -1.55744400 | -1.05414100 |
| N  | -1.56600400 | 0.17528400  | -0.38169100 |
| C  | -0.39380500 | -1.35152500 | -2.02326900 |
| C  | -1.69777400 | -1.02124400 | -1.29013800 |

|   |             |             |             |
|---|-------------|-------------|-------------|
| C | 2.09045900  | -1.36175900 | -1.60926200 |
| C | 3.07118400  | -0.92562500 | -0.49220000 |
| C | 0.60807400  | -2.84629900 | -0.29867400 |
| C | -0.12264500 | -2.70135600 | 1.05007000  |
| C | -1.63208700 | 1.46866700  | -1.12934600 |
| C | -0.28021200 | 1.92183600  | -1.71662700 |
| C | -2.53686600 | 0.13662400  | 0.74326400  |
| C | -4.02864700 | 0.27547700  | 0.44979700  |
| H | -0.54339300 | -2.24920200 | -2.63926900 |
| H | -0.10571100 | -0.53486100 | -2.68768600 |
| H | -2.00163200 | -1.86800200 | -0.66823000 |
| H | -2.49489100 | -0.85308200 | -2.01985000 |
| H | 2.04854500  | -0.54662700 | -2.33688200 |
| H | 2.46057500  | -2.26690300 | -2.10091200 |
| H | 1.62014000  | -3.19756700 | -0.07529800 |
| H | 0.11864900  | -3.61270600 | -0.90744000 |
| H | -1.93946000 | 2.24513800  | -0.42026400 |
| H | -2.38591100 | 1.42906900  | -1.92001100 |
| H | -2.28459200 | 0.94084700  | 1.43805200  |
| H | -2.38555600 | -0.79445500 | 1.29847500  |
| H | -5.33969000 | 0.18682900  | -0.89397300 |
| S | 0.61152700  | 1.73715600  | 2.06586300  |
| H | 1.73698500  | 1.29865800  | 2.67866000  |
| N | 1.70536900  | 3.08930100  | 0.78879800  |
| O | 2.83821300  | 2.97253200  | 0.85979400  |

Energy = -1722.8182998

**Structure III**Low frequencies (cm<sup>-1</sup>): 39.79 44.43 46.50

|    |             |             |             |
|----|-------------|-------------|-------------|
| Ru | 0.52136500  | -0.15076500 | -0.31862000 |
| O  | 4.41260000  | 0.29223100  | 0.72638700  |
| O  | 2.54934200  | -0.33878300 | -0.36516700 |
| O  | 0.62708200  | 3.55568800  | -1.94507200 |
| O  | 0.43825000  | 1.32756900  | -1.69614100 |
| O  | -0.66761400 | -2.43019800 | 2.90342000  |
| O  | 0.53369000  | -1.54627800 | 1.22229000  |
| O  | -4.20825000 | 0.64287900  | 1.05769100  |
| O  | -4.79691100 | 0.55821000  | -1.14607400 |
| N  | 1.02655600  | 1.42881600  | 1.01636000  |
| N  | -1.50275500 | 0.11042000  | 0.42608500  |
| C  | -0.12475100 | 1.53681600  | 1.95929000  |
| C  | -1.43474400 | 1.40399300  | 1.19485000  |
| C  | 2.30261000  | 0.98493700  | 1.64024400  |
| C  | 3.20112300  | 0.28182800  | 0.59548200  |
| C  | 1.21610300  | 2.65676800  | 0.18025300  |
| C  | 0.70724500  | 2.54094900  | -1.27486000 |
| C  | -1.81765200 | -1.05045100 | 1.31664300  |
| C  | -0.57778600 | -1.73138400 | 1.90769500  |
| C  | -2.52566700 | 0.23316700  | -0.66372400 |
| C  | -4.02475100 | 0.51380100  | -0.17455600 |
| H  | -0.09590900 | 2.49773100  | 2.49292600  |
| H  | -0.02113900 | 0.74111800  | 2.70080800  |
| H  | -1.52100200 | 2.20978900  | 0.45994400  |
| H  | -2.31435000 | 1.46355900  | 1.84034700  |
| H  | 2.06383900  | 0.24224700  | 2.40638200  |
| H  | 2.84111600  | 1.81983400  | 2.10217500  |
| H  | 2.28732800  | 2.87121800  | 0.11965700  |

|   |             |             |             |
|---|-------------|-------------|-------------|
| H | 0.73950700  | 3.51976100  | 0.65590800  |
| H | -2.32210300 | -1.80257400 | 0.70114900  |
| H | -2.52836700 | -0.75292700 | 2.08762300  |
| H | -2.52049700 | -0.69777400 | -1.23422300 |
| H | -2.20852600 | 1.03337900  | -1.33562900 |
| N | 0.19425100  | -1.59298700 | -1.67349100 |
| O | -0.32864000 | -1.45825100 | -2.74842600 |
| S | 0.84448200  | -3.26457400 | -1.34194700 |
| H | 1.11521300  | -2.94935900 | -0.04845700 |

Energy = -1722.3180916

**Structure IV**

Low frequencies (cm<sup>-1</sup>): 24.30 42.99 44.85

|    |             |             |             |
|----|-------------|-------------|-------------|
| Ru | 0.52106500  | 0.04064300  | 0.38238500  |
| O  | 4.39342700  | -0.39378100 | -0.70204900 |
| O  | 2.55795300  | 0.20045800  | 0.45961000  |
| O  | 0.57034300  | -3.79156300 | 1.68807300  |
| O  | 0.39238000  | -1.54828100 | 1.63501300  |
| O  | -0.62814000 | 2.50145100  | -2.71068100 |
| O  | 0.53470300  | 1.57546300  | -1.02563200 |
| O  | -4.24747500 | -0.54339800 | -0.99621000 |
| O  | -4.82950000 | -0.56168600 | 1.20946200  |
| N  | 0.97090400  | -1.40564500 | -1.07239800 |
| N  | -1.52018400 | -0.10498800 | -0.34789300 |
| C  | -0.18847600 | -1.41695300 | -2.01455300 |
| C  | -1.48980700 | -1.32811000 | -1.22681100 |
| C  | 2.25504400  | -0.92566500 | -1.65887100 |
| C  | 3.18336600  | -0.35248200 | -0.55731000 |
| C  | 1.14922200  | -2.70955500 | -0.35362600 |
| C  | 0.65126900  | -2.72182500 | 1.10914500  |
| C  | -1.81698200 | 1.12859200  | -1.14007600 |



|   |             |             |             |
|---|-------------|-------------|-------------|
| C | -0.56254700 | 1.78975600  | -1.71951900 |
| C | -2.54789600 | -0.29130400 | 0.73241300  |
| C | -4.05250000 | -0.48891600 | 0.24246600  |
| H | -0.17570800 | -2.33061600 | -2.62577300 |
| H | -0.07720400 | -0.56449900 | -2.68865700 |
| H | -1.58412300 | -2.19369700 | -0.56410400 |
| H | -2.37759000 | -1.31606600 | -1.86399300 |
| H | 2.02455900  | -0.10238500 | -2.34050000 |
| H | 2.76828200  | -1.72136900 | -2.20993300 |
| H | 2.21773500  | -2.94246600 | -0.32248500 |
| H | 0.65682400  | -3.51692500 | -0.90431200 |
| H | -2.26227400 | 1.85514900  | -0.45149400 |
| H | -2.56779500 | 0.91630900  | -1.90124200 |
| H | -2.50997500 | 0.59255300  | 1.37513000  |
| H | -2.24424100 | -1.14972700 | 1.33636900  |
| S | 0.33442000  | 1.72684700  | 2.10909500  |
| H | 1.66561100  | 1.90736500  | 2.29643400  |
| N | 0.19557700  | 3.39607800  | 0.89833400  |
| O | 1.15382200  | 4.04248800  | 0.87594100  |

Energy = -1722.2974927

**Structure V**

Low frequencies (cm<sup>-1</sup>): 46.26 49.08 52.64

|    |             |             |             |
|----|-------------|-------------|-------------|
| Ru | 0.56744600  | -0.35187500 | -0.31033500 |
| O  | 4.53558600  | -0.30491100 | 0.69926400  |
| O  | 2.59740900  | -0.80735800 | -0.33559800 |
| O  | 1.14521800  | 3.22490800  | -2.20375600 |
| O  | 0.53847000  | 1.09911200  | -1.77068100 |
| O  | -0.86320700 | -1.93019700 | 3.21623000  |
| O  | 0.41101900  | -1.46021000 | 1.42821300  |
| O  | -3.98342400 | 1.39367700  | 1.08576500  |

|   |             |             |             |
|---|-------------|-------------|-------------|
| O | -4.66592400 | 1.25576200  | -1.07785300 |
| N | 1.33550700  | 1.27932100  | 0.89499600  |
| N | -1.40750700 | 0.31113600  | 0.41160100  |
| C | 0.22216400  | 1.64367500  | 1.80821300  |
| C | -1.10926600 | 1.63355500  | 1.06245200  |
| C | 2.52915400  | 0.69621600  | 1.55146800  |
| C | 3.31946400  | -0.19762600 | 0.55903000  |
| C | 1.69910800  | 2.36313600  | -0.05601600 |
| C | 1.06834200  | 2.24770000  | -1.46574600 |
| C | -1.86121000 | -0.71091600 | 1.40457900  |
| C | -0.70417900 | -1.42380400 | 2.10730400  |
| C | -2.47403200 | 0.52234100  | -0.63204500 |
| C | -3.85391500 | 1.12208800  | -0.13924400 |
| H | 0.38916000  | 2.64271400  | 2.24486800  |
| H | 0.21469700  | 0.92110800  | 2.62702700  |
| H | -1.08218000 | 2.37568500  | 0.25843100  |
| H | -1.95455900 | 1.89282200  | 1.70618400  |
| H | 2.18037900  | 0.04341900  | 2.35604300  |
| H | 3.19046100  | 1.46910700  | 1.96620000  |
| H | 2.78362500  | 2.33904800  | -0.20384400 |
| H | 1.45149300  | 3.34681600  | 0.36220500  |
| H | -2.38401600 | -1.48470800 | 0.83496200  |
| H | -2.56674200 | -0.26299400 | 2.10589100  |
| H | -2.65221800 | -0.44836900 | -1.10055300 |
| H | -2.04866300 | 1.17723000  | -1.39728600 |
| N | 0.03766300  | -1.86996300 | -1.57844800 |
| O | 0.72931800  | -1.90486000 | -2.59608900 |
| S | -1.17613800 | -3.02990000 | -1.31039900 |

Energy = -1721.7241039

**Structure VI**Low frequencies (cm<sup>-1</sup>): 16.62 39.79 48.09

|    |             |             |             |
|----|-------------|-------------|-------------|
| Ru | 0.54036600  | 0.34843000  | -0.18741800 |
| O  | 4.53357800  | -0.53349600 | -0.46817300 |
| O  | 2.58023100  | 0.59427500  | -0.48178000 |
| O  | 1.00894800  | 0.04688800  | 3.86618900  |
| O  | 0.54255900  | 0.85577000  | 1.81447400  |
| O  | -0.76107600 | -1.74006100 | -3.50741000 |
| O  | 0.46417500  | -0.46609000 | -2.11733600 |
| O  | -4.03539700 | -1.71768800 | 0.29558000  |
| O  | -4.74374300 | 0.19390500  | 1.30165300  |
| N  | 1.26649900  | -1.54389500 | 0.56905900  |
| N  | -1.42026100 | -0.61463200 | -0.11933700 |
| C  | 0.17038500  | -2.51289600 | 0.30937200  |
| C  | -1.17895400 | -1.88864500 | 0.64069900  |
| C  | 2.50492000  | -1.79143600 | -0.20839300 |
| C  | 3.30893200  | -0.47814300 | -0.38381400 |
| C  | 1.55035600  | -1.34360900 | 2.01780700  |
| C  | 0.97430200  | -0.04544600 | 2.64182600  |
| C  | -1.82103400 | -0.87269600 | -1.53691000 |
| C  | -0.62719900 | -1.07476000 | -2.48009300 |
| C  | -2.50184100 | 0.16575500  | 0.58600200  |
| C  | -3.91062400 | -0.54302100 | 0.73636100  |
| H  | 0.31184100  | -3.42862800 | 0.90705600  |
| H  | 0.21893900  | -2.79442700 | -0.74503900 |
| H  | -1.20879000 | -1.62641500 | 1.70299400  |
| H  | -2.01800800 | -2.56475500 | 0.45548500  |
| H  | 2.20966800  | -2.11594200 | -1.21021700 |
| H  | 3.13390700  | -2.56240600 | 0.25602400  |

|   |             |             |             |
|---|-------------|-------------|-------------|
| H | 2.63573900  | -1.29272400 | 2.15139400  |
| H | 1.19381600  | -2.20041900 | 2.60172000  |
| H | -2.34016100 | 0.02778200  | -1.88141600 |
| H | -2.53191500 | -1.69885700 | -1.58052300 |
| H | -2.62612100 | 1.10219100  | 0.03826300  |
| H | -2.11776300 | 0.42810500  | 1.57555900  |
| S | -0.14440600 | 2.44285200  | -1.13998500 |
| N | -0.15591800 | 3.65868500  | 0.15967600  |
| O | -0.46108200 | 4.78127500  | -0.20170600 |

Energy = -1721.7194183

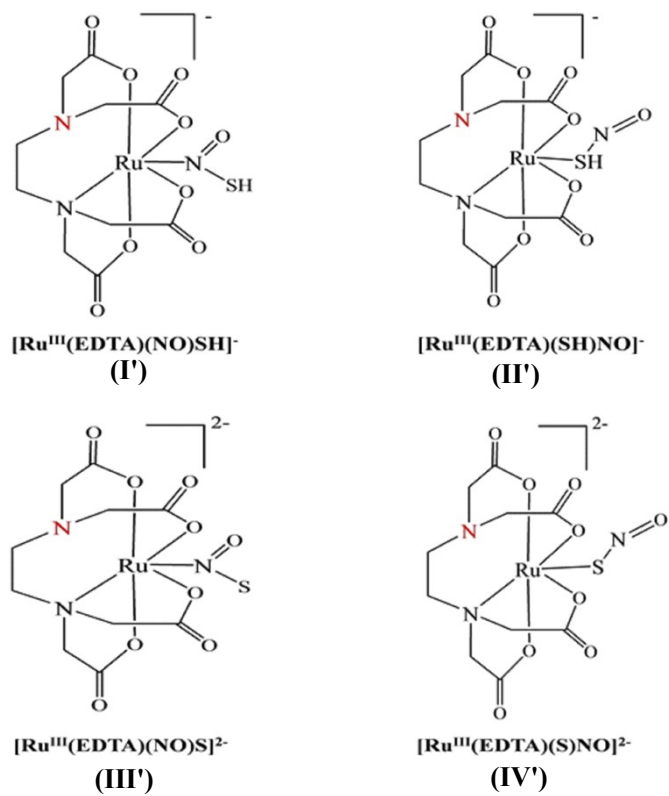

**Figure S3.** Pictorial representations of different HSNO/SNO<sup>-</sup> complexes of Ru<sup>III</sup>(edta) wherein all four carboxylate groups and one N-atom of the ethylenediamine collar are coordinated.

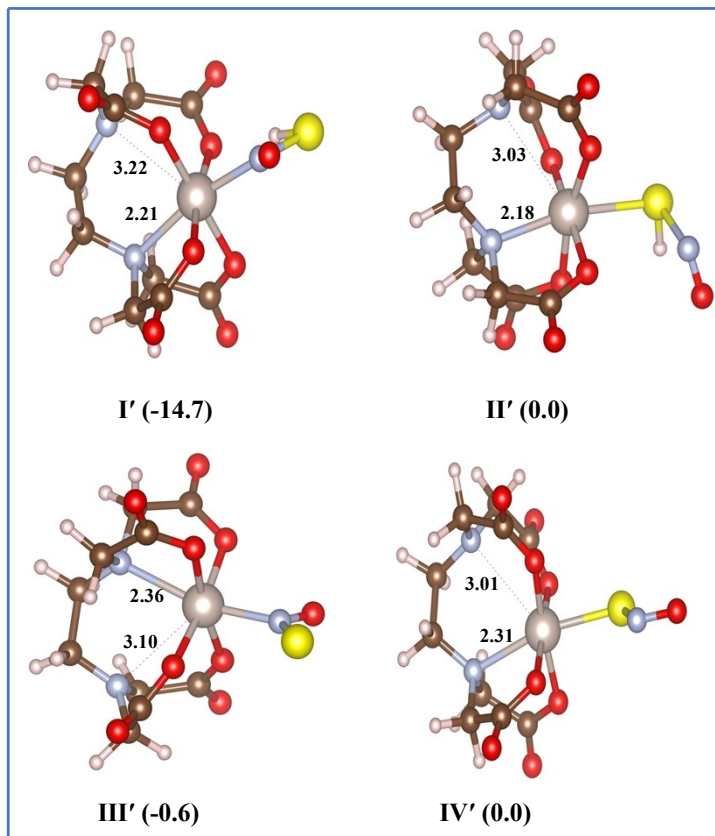

**Figure S4** Optimized structures of I'-IV' which correspond to four -COO bonded and one -NH<sub>2</sub> bonded Ru configurations. The numbers correspond to the important bond-lengths in the molecules.

**Table S3.** Cartesian coordinates, low vibrational frequencies and energies in atomic unit (a.u.) for the optimized structures I'-IV'.

**Structure I'**

Low frequencies (cm<sup>-1</sup>): 19.90 36.45 36.63

|    |             |             |             |
|----|-------------|-------------|-------------|
| Ru | -0.23399000 | -0.45402200 | 0.29961500  |
| N  | 1.57161600  | 2.12234100  | -0.40056300 |
| N  | -1.23233100 | 1.01355100  | -1.02627200 |
| O  | -4.12370400 | 0.32170600  | 1.11635700  |
| O  | 3.74366100  | -0.62783800 | -1.38682600 |
| O  | 1.61453100  | -0.69695100 | -0.71606300 |
| O  | -2.03975500 | -0.51108100 | 1.17037900  |
| O  | -0.91965100 | -1.65324000 | -1.20522800 |

|   |             |             |             |
|---|-------------|-------------|-------------|
| O | 0.41513100  | 0.71515700  | 1.83722400  |
| N | 0.33121200  | -2.01401100 | 1.44721400  |
| H | 0.66096800  | 3.90538800  | -1.08444500 |
| H | -1.50824700 | 3.04213500  | -1.56678300 |
| H | 0.80515100  | 2.60487500  | -2.26443300 |
| H | -1.10793400 | 2.74299900  | 0.12987700  |
| C | 0.59401200  | 2.80528300  | -1.20934500 |
| C | -0.86468700 | 2.44856500  | -0.89611400 |
| H | 2.76978200  | 1.77858200  | -2.08392900 |
| H | -3.19421900 | 1.83579900  | -0.74519500 |
| H | 2.69914300  | 2.32044900  | 1.32998300  |
| H | -1.59925800 | 0.89950900  | -3.13960200 |
| H | 0.08845800  | 0.64166200  | -2.62972000 |
| H | 1.60192300  | 3.67661300  | 1.03177100  |
| C | 1.69877600  | 2.58080700  | 0.96253500  |
| C | -0.95518200 | 0.44940400  | -2.37258200 |
| C | 2.69932100  | 1.47707000  | -1.02939000 |
| C | -2.69407000 | 0.86397100  | -0.70541900 |
| H | 3.64510200  | 1.79160200  | -0.56824700 |
| H | -3.15823700 | 0.23285900  | -1.46959500 |
| O | -1.45238400 | -1.66273100 | -3.39135300 |
| O | 0.32006700  | 2.68347800  | 2.90985600  |
| C | 2.71134200  | -0.06768900 | -1.03304200 |
| C | -3.00293300 | 0.20292300  | 0.64797400  |
| C | -1.14216800 | -1.08263200 | -2.36242400 |
| C | 0.70079800  | 1.98032100  | 1.98189200  |
| O | -0.13407900 | -2.24089600 | 2.52909600  |



|   |            |             |             |
|---|------------|-------------|-------------|
| H | 1.84286000 | -2.36314300 | -0.20705600 |
| S | 1.51217600 | -3.22215700 | 0.82060300  |

Energy = -1722.3224248

**Structure II'**

Low frequencies (cm<sup>-1</sup>): 21.24 30.99 37.72

|    |             |             |             |
|----|-------------|-------------|-------------|
| Ru | -0.31195800 | -0.08389800 | -0.28873800 |
| N  | 2.58212100  | -0.37249600 | 0.56536500  |
| N  | 0.23205100  | 1.47472100  | 1.14639300  |
| O  | -2.85602100 | 0.39801800  | 2.84573700  |
| O  | 3.05818900  | 0.62092600  | -2.83155500 |
| O  | 1.12771700  | 0.37828200  | -1.72471200 |
| O  | -1.89585300 | -0.35728000 | 0.95886700  |
| O  | -1.29742400 | 1.53439000  | -1.06472000 |
| O  | 0.32889600  | -1.94269500 | 0.41595500  |
| H  | 3.56480100  | 0.96216300  | 1.91297600  |
| H  | 1.64507000  | 2.25155500  | 2.51797600  |
| H  | 2.94155200  | 1.65847000  | 0.42226000  |
| H  | 1.23939300  | 0.54073800  | 2.71322700  |
| C  | 2.71966200  | 0.91574900  | 1.19509400  |
| C  | 1.45982500  | 1.31287900  | 1.97041300  |
| H  | 4.21759200  | -0.25630400 | -0.80795100 |
| H  | -0.63633700 | 1.69033900  | 3.09354400  |
| H  | 3.38958800  | -2.19458800 | 1.29703200  |
| H  | 0.33568000  | 3.59876700  | 0.87391600  |
| H  | 1.23076000  | 2.62103900  | -0.32191900 |
| H  | 2.50643500  | -1.23864500 | 2.46740300  |
| C  | 2.51255100  | -1.53903400 | 1.41231600  |
| C  | 0.31639400  | 2.68110100  | 0.27196700  |

|   |             |             |             |
|---|-------------|-------------|-------------|
| C | 3.15389300  | -0.54208600 | -0.74919500 |
| C | -0.96387700 | 1.59482000  | 2.05480500  |
| H | 3.09167800  | -1.60565700 | -1.00765500 |
| H | -1.50555600 | 2.51294400  | 1.80751000  |
| O | -1.29509100 | 3.78549200  | -1.12173300 |
| O | 1.23243100  | -3.51846400 | 1.72932100  |
| C | 2.40987500  | 0.22755600  | -1.86491000 |
| C | -1.99497300 | 0.44763400  | 1.98001200  |
| C | -0.86278600 | 2.71662300  | -0.71634900 |
| C | 1.25859700  | -2.41811900 | 1.18481400  |
| N | -2.89083800 | -2.21724900 | -0.83132100 |
| H | -2.10772900 | -0.56472900 | -2.56798100 |
| O | -3.91666700 | -1.73662800 | -1.07390800 |
| S | -1.34965400 | -1.50990500 | -1.95992100 |

Energy = -1722.299023

**Structure III'**Low frequencies (cm<sup>-1</sup>): 34.84 38.35 42.99

|    |             |             |             |
|----|-------------|-------------|-------------|
| Ru | -0.39968700 | -0.35990400 | 0.25018700  |
| N  | 2.43918200  | 0.60245900  | -0.54675500 |
| N  | -0.27012300 | 1.89809600  | -0.43675100 |
| O  | -1.77546800 | 2.52781100  | 2.83412200  |
| O  | 1.65477000  | -1.28383500 | -3.37725700 |
| O  | 0.37610500  | -1.11812400 | -1.53964300 |
| O  | -1.22639600 | 0.56098200  | 1.89277000  |
| O  | -2.15141800 | -0.02328800 | -0.78795600 |
| O  | 1.24860700  | -0.82946500 | 1.48552300  |
| N  | -1.03359700 | -2.19093300 | 0.88078100  |
| H  | 3.01426500  | 2.52676900  | -1.28811800 |
| H  | 0.87677800  | 3.58645500  | -1.02473700 |
| H  | 1.85658500  | 1.60923400  | -2.24787200 |
| H  | 1.32344900  | 2.83246100  | 0.51101900  |
| C  | 2.14199200  | 1.83805700  | -1.21548100 |
| C  | 1.01624200  | 2.61251000  | -0.51646300 |
| H  | 3.56210100  | -0.41446000 | -2.05916000 |
| H  | -0.80891400 | 3.59259600  | 0.75833500  |
| H  | 4.12960200  | 0.43285600  | 0.74300100  |
| H  | -1.19256500 | 2.78875300  | -2.15449000 |
| H  | -0.24799600 | 1.30364600  | -2.45865700 |
| H  | 2.94394000  | 1.65438600  | 1.17782900  |
| C  | 3.04459100  | 0.64582700  | 0.75796800  |
| C  | -0.92786500 | 1.79528700  | -1.75797000 |
| C  | 2.71923600  | -0.55922000 | -1.35823400 |

|   |             |             |             |
|---|-------------|-------------|-------------|
| C | -1.16828700 | 2.57979800  | 0.54098700  |
| H | 2.98277100  | -1.37942200 | -0.68111300 |
| H | -2.16115900 | 2.68991900  | 0.09209200  |
| O | -3.14779300 | 1.17981300  | -2.40939000 |
| O | 3.05244100  | -0.56780800 | 2.79718900  |
| C | 1.49142400  | -1.01987100 | -2.18016500 |
| C | -1.38919100 | 1.84514200  | 1.88424700  |
| C | -2.19892800 | 0.92782800  | -1.66759700 |
| C | 2.39936800  | -0.33014900 | 1.77588900  |
| O | -1.04032900 | -2.37119500 | 2.09048900  |
| S | -1.58353200 | -3.38532200 | -0.19519600 |

Energy = -1721.6998154

**Structure IV'**

Low frequencies (cm<sup>-1</sup>): 23.62 28.99 40.42

|    |             |             |             |
|----|-------------|-------------|-------------|
| Ru | 0.42631100  | -0.16144800 | -0.21114600 |
| N  | -1.86247800 | 1.68505200  | 0.46542800  |
| N  | -1.39582800 | -1.27355600 | 0.68943200  |
| O  | 1.08889200  | -2.56828900 | 3.05124400  |
| O  | -2.11203000 | 1.82890600  | -3.06641700 |
| O  | -0.63248900 | 0.64233300  | -1.86480100 |
| O  | 1.36659600  | -1.14244900 | 1.33278500  |
| O  | 0.32350600  | -1.92243800 | -1.30173300 |
| O  | 0.83039100  | 1.57730300  | 0.93548100  |
| H  | -3.78952200 | 1.15116200  | 1.22825700  |
| H  | -3.31455900 | -1.17458600 | 1.59579700  |
| H  | -3.32963100 | 0.46855400  | -0.32969000 |

|   |             |             |             |
|---|-------------|-------------|-------------|
| H | -2.03718000 | -0.22085700 | 2.36296500  |
| C | -2.93022400 | 0.73919800  | 0.65325300  |
| C | -2.44872500 | -0.51595200 | 1.39263800  |
| H | -2.77166200 | 2.98415500  | -0.97291600 |
| H | -1.38541200 | -2.39956600 | 2.51056300  |
| H | -1.69144200 | 3.41494500  | 1.69519600  |
| H | -2.65786200 | -2.73630700 | -0.23673500 |
| H | -2.42190900 | -1.21984200 | -1.15002300 |
| H | -1.72658900 | 1.87594800  | 2.53995900  |
| C | -1.35390200 | 2.36554000  | 1.63168500  |
| C | -1.92955900 | -1.95735200 | -0.51124000 |
| C | -1.83493100 | 2.43294300  | -0.77104400 |
| C | -0.76985200 | -2.26578100 | 1.61358500  |
| H | -1.02819000 | 3.17059000  | -0.68921800 |
| H | -0.73096500 | -3.23881100 | 1.11250700  |
| O | -1.00723200 | -3.61120300 | -1.97712000 |
| O | 0.69284400  | 3.13924400  | 2.54971900  |
| C | -1.51881500 | 1.56540100  | -2.01365900 |
| C | 0.67994500  | -1.95875300 | 2.06182400  |
| C | -0.79009700 | -2.57980000 | -1.34020800 |
| C | 0.19534500  | 2.36555000  | 1.72371200  |
| N | 3.75030100  | 0.47808300  | -0.34228100 |
| O | 4.81435300  | 0.78276300  | -0.86602100 |
| S | 2.37309600  | 0.49037000  | -1.44079100 |

Energy = -1721.6980112

**Table S4.** Cartesian coordinates, low vibrational frequencies and energies in atomic unit (a.u.) for the optimized transition state (TS) structures.

**Structure transition state (TS)**

Imaginary frequency (cm<sup>-1</sup>): -248.7474

|    |             |             |             |
|----|-------------|-------------|-------------|
| Ru | 0.53611400  | 0.03284000  | 0.30254200  |
| O  | 4.41170000  | -0.46978300 | -0.74530700 |
| O  | 2.58148100  | 0.17562600  | 0.40170700  |
| O  | 0.47182400  | -3.75676400 | 1.71009500  |
| O  | 0.32664600  | -1.51025000 | 1.60808300  |
| O  | -0.59774900 | 2.50967200  | -2.77592600 |
| O  | 0.58455300  | 1.47189900  | -1.17117700 |
| O  | -4.23644100 | -0.51600100 | -1.00701800 |
| O  | -4.79844800 | -0.46071700 | 1.20371500  |
| N  | 0.97090800  | -1.41702000 | -1.07496200 |
| N  | -1.50551500 | -0.09374000 | -0.40363100 |
| C  | -0.18892600 | -1.45825000 | -2.02699600 |
| C  | -1.49527000 | -1.33539000 | -1.25268000 |
| C  | 2.26278800  | -0.97616000 | -1.68972800 |
| C  | 3.20248700  | -0.39999200 | -0.60000000 |
| C  | 1.14745700  | -2.70962400 | -0.32016300 |
| C  | 0.58849600  | -2.69725400 | 1.11940300  |
| C  | -1.78772800 | 1.13237800  | -1.21438200 |
| C  | -0.52407800 | 1.76559500  | -1.80968400 |
| C  | -2.51656800 | -0.23690500 | 0.69585600  |
| C  | -4.03114600 | -0.42600000 | 0.22726800  |
| H  | -0.16504900 | -2.39486700 | -2.59991200 |
| H  | -0.06492000 | -0.62996400 | -2.72701000 |
| H  | -1.61042500 | -2.18520800 | -0.57324900 |

|   |             |             |             |
|---|-------------|-------------|-------------|
| H | -2.37566600 | -1.32343400 | -1.89976000 |
| H | 2.03899900  | -0.16578900 | -2.38728100 |
| H | 2.74458100  | -1.80356600 | -2.22086000 |
| H | 2.21974500  | -2.90879000 | -0.24007200 |
| H | 0.69811200  | -3.53388800 | -0.88141100 |
| H | -2.22508300 | 1.87324900  | -0.53793900 |
| H | -2.54065200 | 0.91646300  | -1.97267600 |
| H | -2.45337500 | 0.66348700  | 1.31259400  |
| H | -2.22014400 | -1.08674200 | 1.31500000  |
| S | 0.94295600  | 1.65458100  | 3.03247700  |
| H | 1.94677400  | 2.56050500  | 2.95099300  |
| N | -0.03399100 | 2.34811800  | 1.56917900  |
| O | 0.30316600  | 3.40117000  | 1.15627000  |

Energy: -1722.2709623
